# Supplementary material
Source: MDPI journal article supplement (https://www.mdpi.com/2077-1312/11/2/248)
Supplement: s1 [file s1]

Supplementary Material

# Development and Validation of Accumulation Term (Distributed and/or Point Source) in a Finite Element Hydrodynamic Model

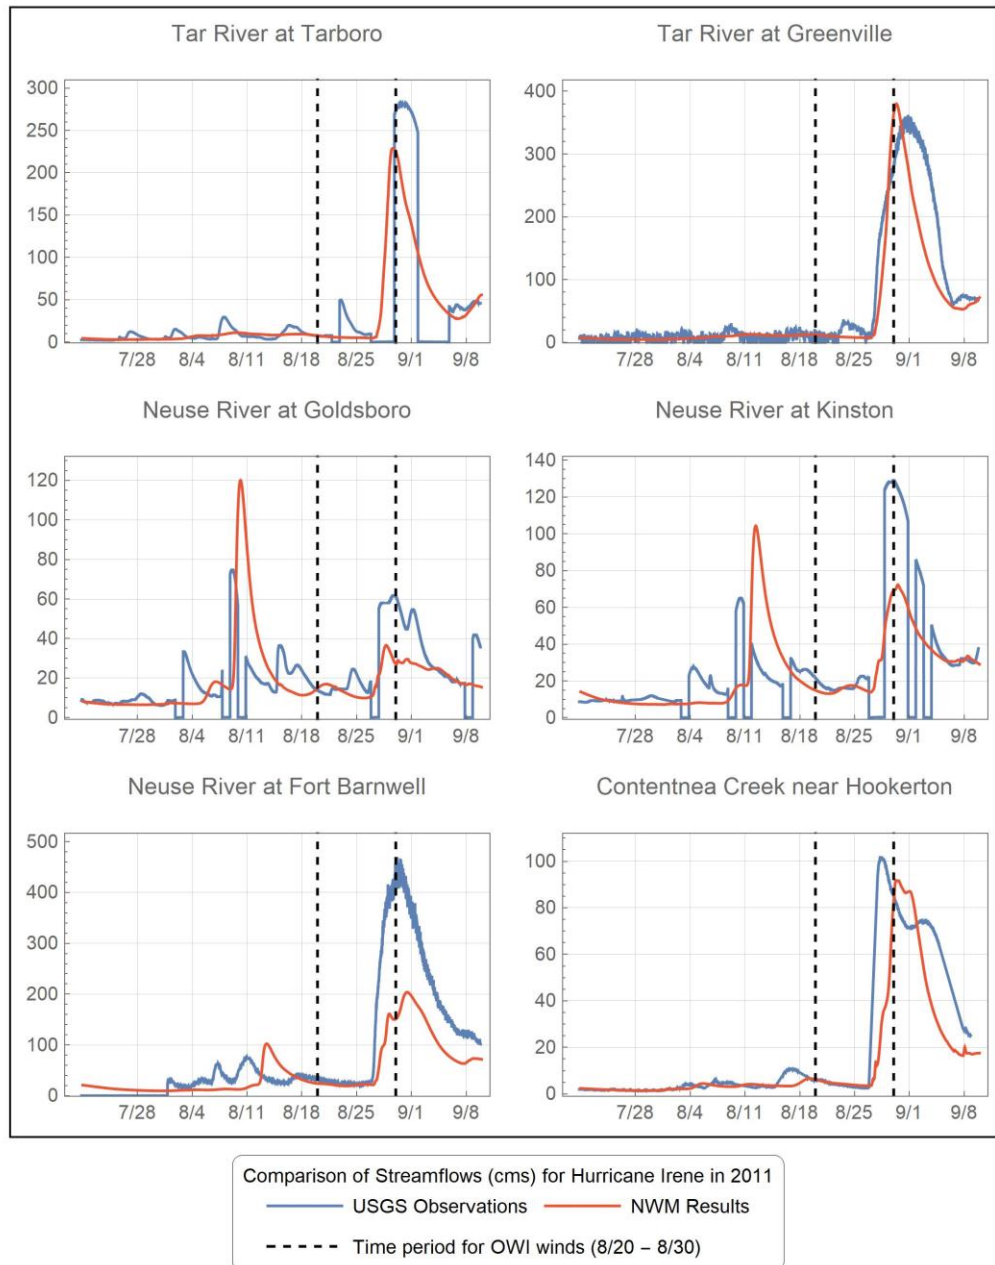

**Figure S1.** Comparison of observed streamflows at all available USGS gauging stations (with streamflow records) to simulated streamflows at the nearest available NWM location.

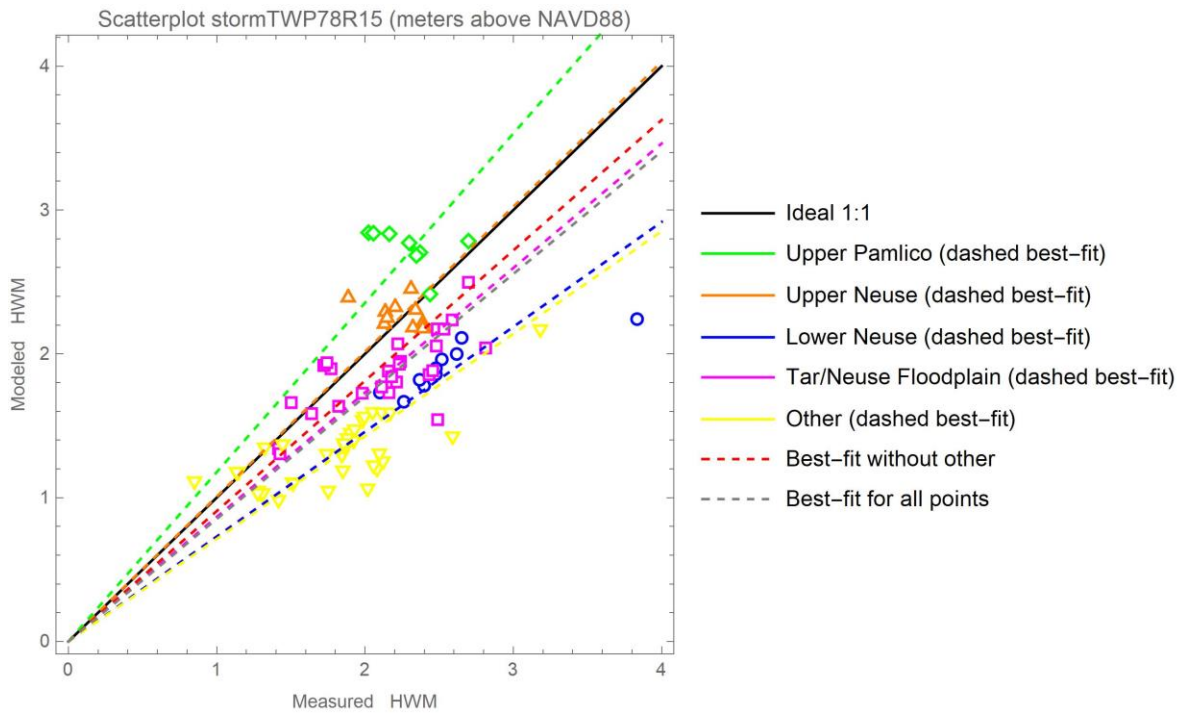

**Figure S2.** Scatterplot for HWM analysis of the simulation with all new source terms activated (TWP78R15). Shapes correspond to the locations shown in Figure 6 (diamonds—Tar River, triangles—Upper Neuse River, squares—Tar/Neuse floodplains, circles—Lower Neuse River, inverted triangles—all Other locations), which are also color-coded to the corresponding best-fit lines in this plot.
